# Supplementary material
Source: publisher site journal article supplement (https://dez.pensoft.net/article/68373/download/suppl/33/)
Supplement: Supplementary file 1

**Table S2. Sequence correction record**

Done in the alignments whose both ends were already trimmed.

| Gene  | Sequence                                           | Diagnosis and treatment                                                                                                                                                                          |
|-------|----------------------------------------------------|--------------------------------------------------------------------------------------------------------------------------------------------------------------------------------------------------|
| atp6  | Megaloblatta_sp_ECMD1_MG882218_1_Ectobiidae        | Beginning with 60 missing cells; question-marked                                                                                                                                                 |
| atp6  | Schultesia_lampyridiformis_MG882163_1_Blaberidae   | Beginning with 36 missing cells; question-marked                                                                                                                                                 |
| atp8  | Aposthonia_borneensis_KX965988_1_Oligotomidae      | Near end are 12 missing cells; question-marked                                                                                                                                                   |
| atp8  | Asiablatta_kyotensis_MG882166_1_Ectobiidae         | Ending with 21 missing cells; question-marked                                                                                                                                                    |
| atp8  | Ectoneura_hanitschi_MG882219_1_Ectobiidae          | Near end are 36 missing cells; question-marked                                                                                                                                                   |
| atp8  | Galiblatia_cribrosa_MG882232_1_Blaberidae          | Beginning with 48 missing cells; question-marked                                                                                                                                                 |
| atp8  | Megaloblatta_sp_ECMD1_MG882218_1_Ectobiidae        | Beginning with 72 missing cells; question-marked                                                                                                                                                 |
| cox1  | Megaloblatta_sp_ECMD1_MG882218_1_Ectobiidae        | 33 out of 36 Ns are redundant (as inserts) and deleted                                                                                                                                           |
| cox3  | Aposthonia_borneensis_KX965988_1_Oligotomidae      | Beginning with 24 missing cells; question-marked                                                                                                                                                 |
| cox3  | Cryptocercus_punctulatus_MG882217_1_Cryptocercidae | Beginning with 15 missing cells; question-marked                                                                                                                                                 |
| cox3  | Ergaula_capucina_MG882188_1_Corydiidae             | Beginning with 18 missing cells; question-marked                                                                                                                                                 |
| cox3  | Tryonicus_parvus_MG882230_1_Tryonicidae            | Beginning with 15 missing cells; question-marked                                                                                                                                                 |
| cytb  | Eublaberus_distanti_MG882147_1_Blaberidae          | Poorly-sequenced tail beginning with 8 Ns; question-marked for 55 bases                                                                                                                          |
| cytb  | Rhabdoblatta_sp_RHA_MG882228_1_Blaberidae          | (1) 12 different codons (36 bases) and an indel (3 bases) and a stop codon (1 base) in conserved region; question-marked, 40 in total<br>(2) Poorly-sequenced tail; question-marked for 39 bases |
| nad1  | Anallacta_methanoides_MG882165_1_Ectobiidae        | <b>Many indels and differences in conserved region; whole sequence discarded!</b>                                                                                                                |
| nad1  | Beybienkoa_kurandanensis_MG882208_1_Ectobiidae     | 45 out of 52 Ns redundant (as inserts) and deleted                                                                                                                                               |
| nad2  | Galiblatia_cribrosa_MG882232_1_Blaberidae          | Ending with 204 missing cells; question-marked                                                                                                                                                   |
| nad2  | Megaloblatta_sp_ECMD1_MG882218_1_Ectobiidae        | Ending with 94 Ns in alignment; kept                                                                                                                                                             |
| nad2  | Metallyticus_sp_JZ_2017_KY689122_1_Metallyticidae  | <b>Many indels and stop codons throughout; whole sequence discarded!</b>                                                                                                                         |
| nad3  | Epilampra_maya_MG882194_1_Blaberidae               | Beginning with a certain number of missing bases but the region is not very conserved; not question-marked                                                                                       |
| nad4  | Allacta_bimaculata_MG882128_1_Ectobiidae           | Beginning with a certain number of missing bases but the region is not very conserved; not question-marked                                                                                       |
| nad4  | Beybienkoa_kurandanensis_MG882208_1_Ectobiidae     | Poorly-sequenced tail beginning with 44 Ns; question-marked for 111 cells                                                                                                                        |
| nad4  | Ergaula_capucina_MG882188_1_Corydiidae             | Ending with missing 72 cells; question-marked                                                                                                                                                    |
| nad4  | Eublaberus_distanti_MG882147_1_Blaberidae          | Missing and not aligned in conserved region in the middle; question-marked for 231 cells                                                                                                         |
| nad4  | Euphyllodromia_sp_Z257_MG882238_1_Ectobiidae       | Ending with 54 missing cells; question-marked                                                                                                                                                    |
| nad4  | Epilampra_maya_MG882194_1_Blaberidae               | Beginning with a certain number of missing bases but the region is not very conserved; not question-marked                                                                                       |
| nad4  | Galiblatia_cribrosa_MG882232_1_Blaberidae          | Beginning with a certain number of missing bases but the region is not very conserved; not question-marked                                                                                       |
| nad4  | Nocticola_sp_JW1_9_1_MG882221_1_Nocticolidae       | Beginning with a certain number of missing bases but the region is not very conserved; not question-marked                                                                                       |
| nad4  | Paranauphoeta_circumdata_MG882225_1_Blaberidae     | Beginning with a certain number of missing bases but the region is not very conserved; not question-marked                                                                                       |
| nad4  | Platyzoetia_sp_AUS3_MG882132_1_Blattidae           | Beginning with a certain number of missing bases but the region is not very conserved; question-marked for 147 that are relatively conserved                                                     |
| nad4L | Galiblatia_cribrosa_MG882232_1_Blaberidae          | Many differences in conserved region at the end of the sequence; question-marked for 48                                                                                                          |
| nad4L | Leptomantella_albella_KJ463364_1_Tarachodidae      | Many differences in conserved region at the end of the sequence (almost the latter half); question-marked for 147                                                                                |
| nad4L | Megaloblatta_sp_ECMD1_MG882218_1_Ectobiidae        | Ending with 96 missing cells; question-marked                                                                                                                                                    |
| nad5  | Anaplecta_calosoma_MG882215_1_Ectobiidae           | Beginning with a certain number of missing bases but the region is not very conserved; not question-marked                                                                                       |
| nad5  | Anaplecta_omei_MG882129_1_Ectobiidae               | Beginning with a certain number of missing bases but the region is not very conserved; not question-marked                                                                                       |
| nad5  | Aposthonia_borneensis_KX965988_1_Oligotomidae      | Many differences at the beginning; the whole poor beginning containing bad cells was deleted and most of them (156 cells) were question-marked                                                   |
| nad5  | Balta_sp_Cairns_Australia_MG882206_1_Ectobiidae    | 69 out of 71 Ns redundant (as inserts) and 93 bases duplicated (also as inserts while these positions are gaps in other sequences); deleted                                                      |
| nad5  | Galiblatia_cribrosa_MG882232_1_Blaberidae          | Beginning with 159 missing cells; question-marked                                                                                                                                                |
| nad5  | Lamproblatta_albipalpus_MG882233_1_Lamproblattidae | 27 out of 48 Ns redundant (as inserts); deleted                                                                                                                                                  |
| nad5  | Megaloblatta_sp_ECMD1_MG882218_1_Ectobiidae        | Poorly-sequenced tail beginning with 118 Ns; question-marked for 134 cells                                                                                                                       |
| nad5  | Platyzoetia_sp_AUS3_MG882132_1_Blattidae           | Middle portion with 24 Ns and also 48 missing cells; the latter question-marked                                                                                                                  |
| nad6  | Galiblatia_cribrosa_MG882232_1_Blaberidae          | Latter half missing; question-marked for 294 cells                                                                                                                                               |
| nad6  | Platyzoetia_sp_AUS3_MG882132_1_Blattidae           | Poorly-sequenced latter half (59 Ns followed by many differences and stop codons); question-marked for 223 cells                                                                                 |
